# Supplementary material for: Fruit Characteristics of Citrus Trees Grown under Different Soil Cu Levels
Source: MDPI journal article supplement (doi:10.3390/plants11212943), 2022-11-01
Supplement: s1 [file s1]

## Supplementary Figure

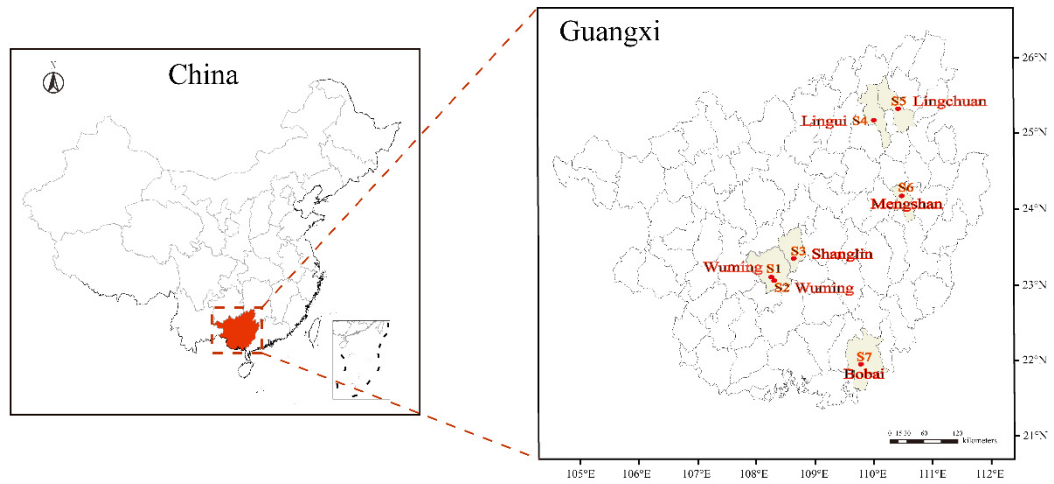

**Figure S1.** Distribution of sampling sites.

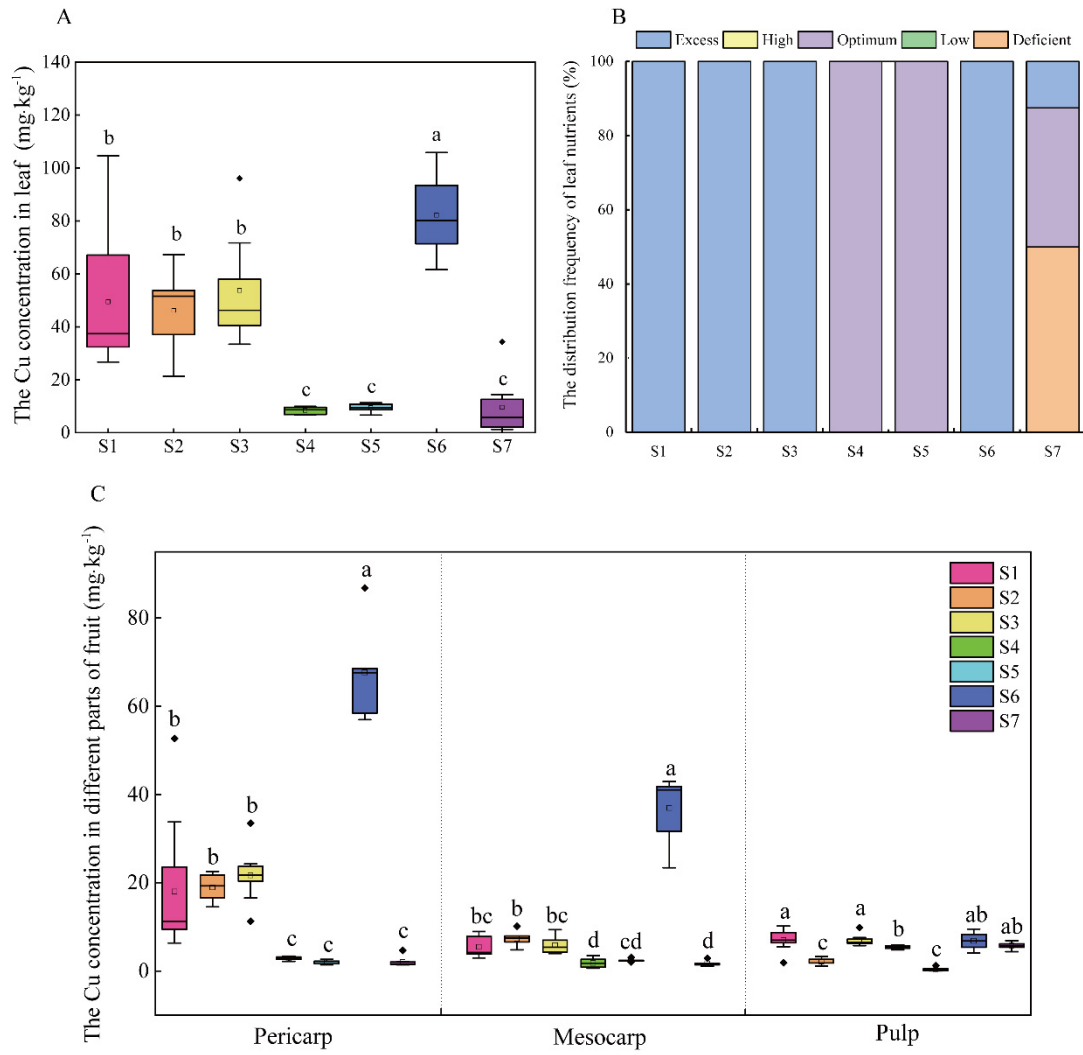

**Figure S2.** The Cu concentrations of leaf and fruit in different orchards. A: leaf Cu concentrations; B: the classification of leaf Cu in different orchards; C: fruit concentrations. The different letters indicated significant differences between sites at 5% level ( $P < 0.05$ ;  $n_{s1}=10$ ,  $n_{s2}=5$ ,  $n_{s3}=9$ ,  $n_{s4}=8$ ,  $n_{s5}=5$ ,  $n_{s6}=6$ ,  $n_{s7}=8$ ).

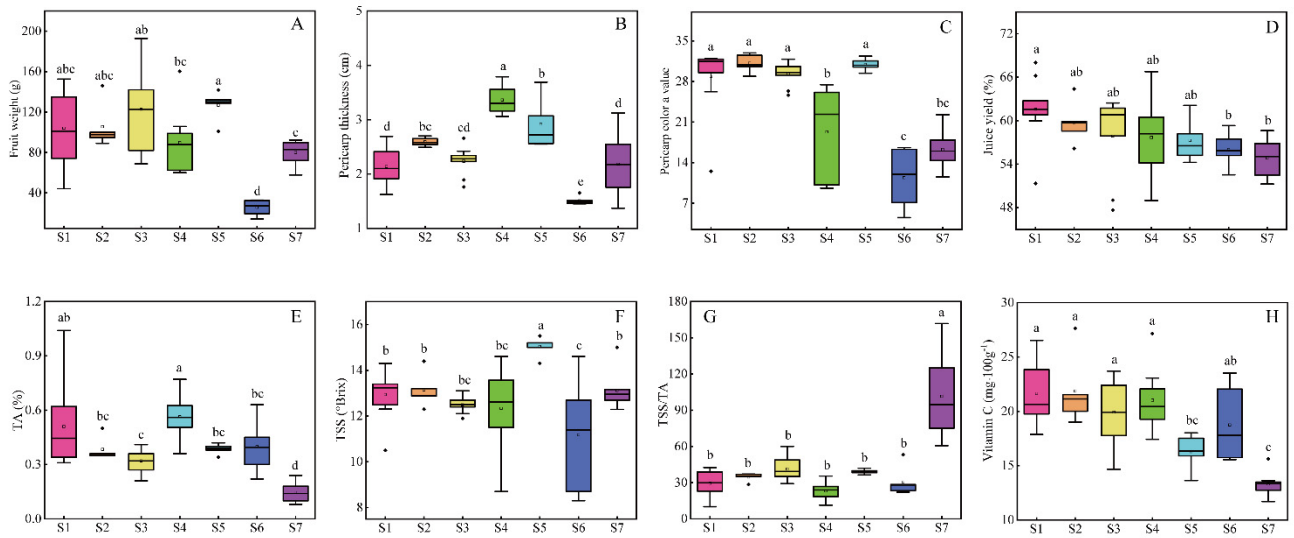

**Figure S3.** Characteristics of fruit quality in different orchards. The different letters indicated significant differences between sites at 5% level ( $P < 0.05$ ;  $n_{s1}=10$ ,  $n_{s2}=5$ ,  $n_{s3}=9$ ,  $n_{s4}=8$ ,  $n_{s5}=5$ ,  $n_{s6}=6$ ,  $n_{s7}=8$ ).

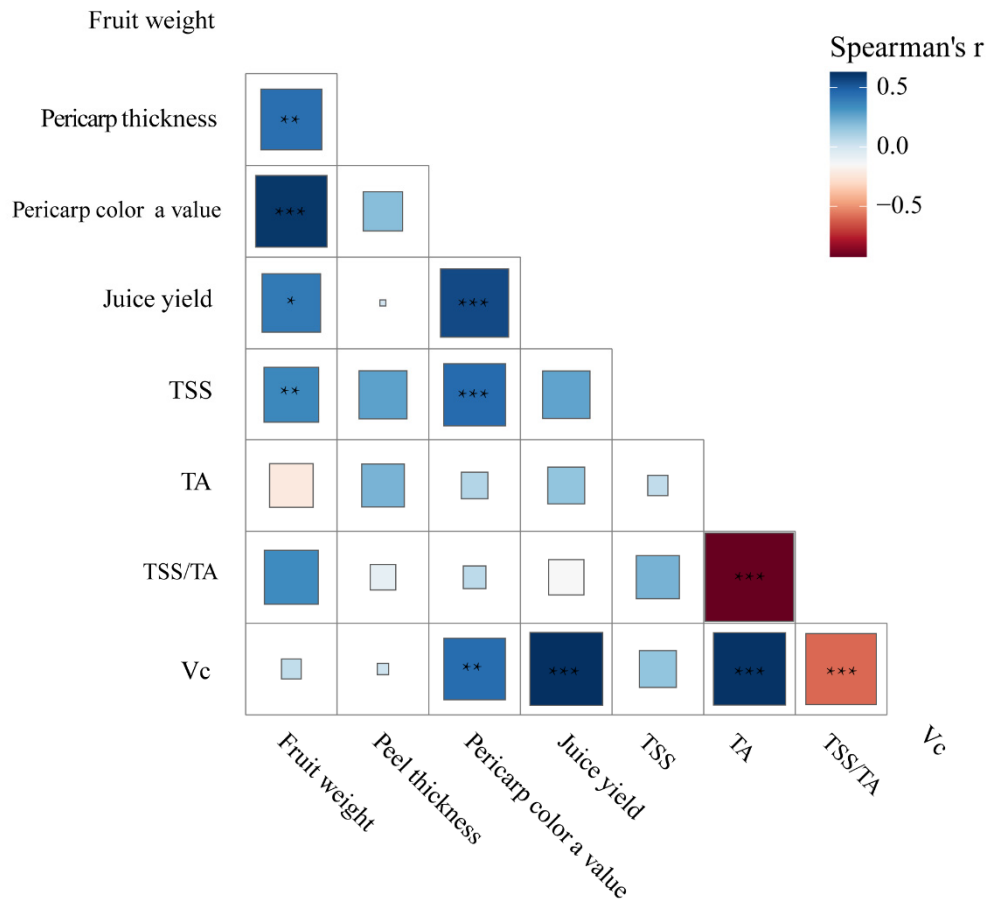

**Figure S4.** Correlation analysis of different fruit qualities in citrus. \*, \*\* and \*\*\* represented in the heatmap indicate statistical differences at  $P < 0.05$ ,  $P < 0.01$ ,  $P < 0.001$  respectively.

**Table S1**

Basic information of citrus orchards.

| Orchard | Samples area                                   |            |           | Sample/ trees | Variety            | Stock                               | Age/a |
|---------|------------------------------------------------|------------|-----------|---------------|--------------------|-------------------------------------|-------|
|         | Site                                           | Longitude  | Latitude  |               |                    |                                     |       |
| S1      | Shuangqiao Town in Wuming District of Guangxi  | 108°18'13" | 23°5'39"  | 10            | Orah mandarin      | <i>Citrus junos</i> Tanaka          | 4     |
| S2      | Shuangqiao Town in Wuming District of Guangxi  | 108°17'22" | 23°6'19"  | 5             | Orah mandarin      | <i>C.reticulata</i> Blanco          | 7     |
| S3      | Mingliang Town in Shanglin District of Guangxi | 108°37'48" | 23°24'5"  | 9             | Orah mandarin      | <i>Poncirus trifoliata</i> (L.) Raf | 6     |
| S4      | Liangjiang Town in Lingui District of Guangxi  | 110°9'53"  | 25°17'6"  | 8             | Orah mandarin      | <i>Poncirus trifoliata</i> (L.) Raf | 4     |
| S5      | Lingtian Town in Lingchuan District of Guangxi | 110°27'35" | 25°20'49" | 5             | Orah mandarin      | <i>Poncirus trifoliata</i> (L.) Raf | 5     |
| S6      | Hexi Town in Mengshan District of Guangxi      | 110°35'32" | 24°11'4"  | 6             | Gonggan mandarin   | <i>Poncirus trifoliata</i> (L.) Raf | 6     |
| S7      | Dongping Town in Bobai District of Guangxi     | 109°49'27" | 22°3'19"  | 8             | Mashuiju tangerine | <i>C.sunki</i> Hort                 | 7     |

**Table S2**

Principal component analysis of fruit quality indicators in different orchards.

| Principal component | Eigenvalue | Variance contribution /% | Accumulative variance contribution /% |
|---------------------|------------|--------------------------|---------------------------------------|
| 1                   | 2.893      | 36.166                   | 36.166                                |
| 2                   | 2.295      | 28.690                   | 64.858                                |
| 3                   | 1.204      | 15.048                   | 79.904                                |

**Table S3**

Fruit quality scores in orchards with different soil Cu levels.

| Soil Cu levels   | Score | Ranking |
|------------------|-------|---------|
| Optimum Cu level | 54.1  | 3       |
| High Cu level    | 70.9  | 1       |
| Excess Cu level  | 59.2  | 2       |

**Table S4**

The datasheet for environmental factors in redundancy analysis (RDA) of fruit quality with different Cu levels.

|              | RDA1   | RDA2   | r <sup>2</sup> | <i>p</i> -values |
|--------------|--------|--------|----------------|------------------|
| Soil Cu      | -0.589 | 0.808  | 0.199          | <b>0.007</b>     |
| Leaf Cu      | -0.946 | -0.323 | 0.079          | 0.147            |
| Pericarp Cu  | -0.047 | -0.999 | 0.171          | <b>0.020</b>     |
| Mescocarp Cu | 0.088  | -0.996 | 0.250          | <b>0.002</b>     |
| Pulp Cu      | 0.300  | -0.954 | 0.137          | <b>0.035</b>     |
